# Supplementary material for: Expansion of the clinical phenotype associated with mutations in activity-dependent neuroprotective protein
Source: PubMed Central journal article supplement — J Med Genet. 2014 Jul 23;51(9):587–9. doi: 10.1136/jmedgenet-2014-102444 (PMC4135390; doi:10.1136/jmedgenet-2014-102444), 2014-07-23
Supplement: NIHMS611020-supplement-01.pdf [file NIHMS611020-supplement-01.pdf]

**Supplementary Material**

**Supplementary Figure 1.** *ADNP* expression in various brain tissue across various timepoints in Allen Institute BrainSpan RNA-seq data. This dataset includes post-mortem samples of 16 brain regions ranging from fetus age eight post-conception weeks to adult age 40 years (n = 524). The data was normalized to RPKM (reads per kilobase per million) and a log base 2 transformation [ $\log(\text{RPKM} + 1)$ ]. *ADNP* expression was significantly greater in fetal compared to non-fetal brains ( $p < 0.001$ , t-test). There is a 3.16-fold increase in *ADNP* fetal expression and a 68.3% decrease in expression in non-fetal brains. pcw=weeks post-conception, mos=postnatal months, yrs=postnatal years.

**Supplementary Table 1.** List of genetic variants (14 genes) identified in whole-exome sequencing (WES). Variants were filtered according to inclusion of those related to patient's phenotype, removal of benign variants and exclusion of polymorphism/sequencing artifacts. Disease association was determined by reviewing the Online Mendelian Inheritance of Man (OMIM) and PubMed. Variants identified by Poly Phen and/or SIFT as damaging also include their genotype frequency from NHLBI GO Exome Sequencing Project (ESP), when possible.

**Supplementary Table 2.** List of genes positively correlated with ADNP ( $\geq .9$ ) from BrainSpan's Developmental Transcriptome.

**Supplementary Table 3.** List of genes negatively correlated with ADNP ( $<-.8$ ) from BrainSpan's Developmental Transcriptome.

**Supplementary Table 4.** Significant biological processes of positively correlated gene pathway analysis. The 10 most highly enriched clusters are reported.

**Supplementary Table 5.** Significant biological processes of negatively correlated gene pathway analysis. The 10 most highly enriched clusters are reported.

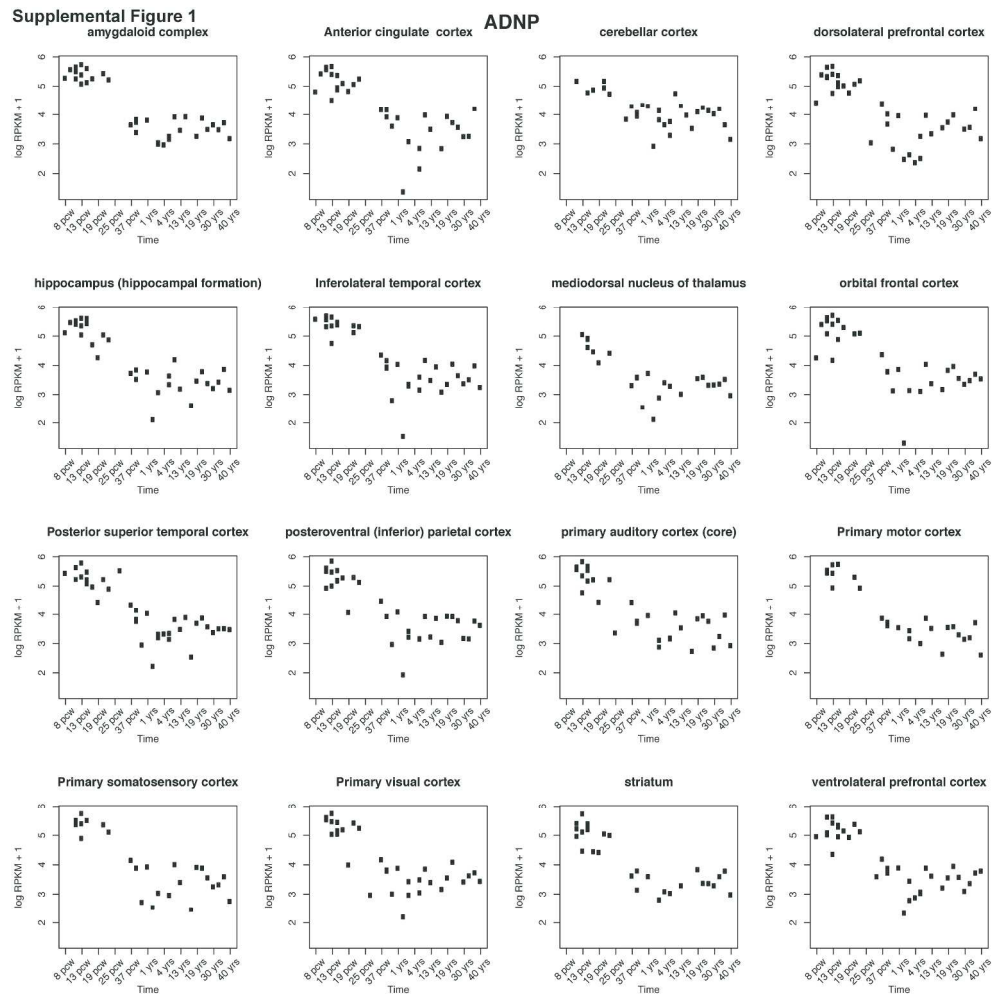

Supplemental Figure 1. ADNP expression in various brain tissue across various timepoints in Allen Institute BrainSpan RNA-seq data. This dataset includes post-mortem samples of 16 brain regions ranging from fetus age eight post-conception weeks to adult age 40 years ( $n = 524$ ). The data was normalized to RPKM (reads per kilobase per million) and a log base 2 transformation [ $\log(\text{RPKM} + 1)$ ]. ADNP expression was significantly greater in fetal compared to non-fetal brains ( $p < 0.001$ , t-test). There is a 3.16-fold increase in ADNP fetal expression and a 68.3% decrease in expression in non-fetal brains. pcw=weeks post-conception, mos=postnatal months, yrs=postnatal years.

287x287mm (300 x 300 DPI)

| Table S1<br>Gene | Locus     | RefSeq       | Variant                          | Proband | PolyPhen          | SIFT      | ESP Genotype #*   | Disease Association                                                                                                                                                                     | Disease Notes (OMIM)                                                                                                                                                                                                                                                                                                                                                                                                                                                                                                                                                                                                                                                                                                                                                                                                                                                                                                                                                                      |
|------------------|-----------|--------------|----------------------------------|---------|-------------------|-----------|-------------------|-----------------------------------------------------------------------------------------------------------------------------------------------------------------------------------------|-------------------------------------------------------------------------------------------------------------------------------------------------------------------------------------------------------------------------------------------------------------------------------------------------------------------------------------------------------------------------------------------------------------------------------------------------------------------------------------------------------------------------------------------------------------------------------------------------------------------------------------------------------------------------------------------------------------------------------------------------------------------------------------------------------------------------------------------------------------------------------------------------------------------------------------------------------------------------------------------|
| ADNP             | 20q13.13  | NM_015339    | c.2157C>G p.Y719X                | +/-     | NR                | NR        | N/A               | Autism                                                                                                                                                                                  | Multiple frameshift and nonsense mutations identified in individuals with autism (Helsmoortel et al 2014; O'Roak et al 2012a; O'Roak et al 2012b)                                                                                                                                                                                                                                                                                                                                                                                                                                                                                                                                                                                                                                                                                                                                                                                                                                         |
| MYO9B            | 19p13.1   | NM_004145    | c.5567G>A p.R1856H               | +/-     | probably damaging | damaging  | AA=0/AG=1/GG=6490 | Schizophrenia,<br>Celiac disease,<br>Inflammatory bowel disease,<br>Crohn's disease,<br>Ulcerative colitis,<br>Acute pancreatitis,<br>Barrett's esophagus/<br>esophageal adenocarcinoma | <b>Schizophrenia:</b> rs1457092*A and rs2305767*A (Jungerius et al 2008);<br><b>Celiac disease:</b> rs2305764*A (Monsuur et al 2005), rs7259292 (Wolters et al 2007), rs1457092C/T (Loeff et al 2012);<br><b>Inflammatory bowel disease:</b> rs2305767 (Cooney et al 2009), rs962917 (van Bodegraven et al 2006, Latiano et al 2008), rs1545620 (van Bodegraven et al 2006, Latiano et al 2008), rs2305764 (van Bodegraven et al 2006, Latiano et al 2008), rs2279002 (van Bodegraven et al 2006);<br><b>Crohn's disease:</b> rs2305767 (Cooney et al 2009), rs1457092 (Wolters et al 2011), rs2305764 (Wolters et al 2011), rs962917 (Wolters et al 2011);<br><b>Ulcerative colitis:</b> rs1545620T/T (Shi et al 2011), rs2305767 (Nunez et al 2007), rs1457092 (Nunez et al 2007), rs2305764 (Nunez et al 2007);<br><b>Acute pancreatitis:</b> rs7259292 and rs1545620 (Nijmeijer et al 2013);<br><b>Barrett's esophagus/esophageal adenocarcinoma:</b> rs2305764G/G (Menke et al 2012) |
| MAML3            | 4q28      | NM_018717    | c.1526_1527insGCA p.Q509delinsRK | +/-     | NR                | NR        | N/A               | Congenital heart malformations,<br>Biphenotypic sinonasal sarcoma                                                                                                                       | One SNP (rs1531070) was significantly associated with congenital heart malformations in a Han Chinese GWAS study (Hu et al 2013);<br>Chromosomal translocation resulting in a PAX3-MAML3 fusion protein is associated with biphenotypic sinonasal sarcoma (Wang et al 2014). However, the direct role MAML3 plays in oncogenesis is unknown.                                                                                                                                                                                                                                                                                                                                                                                                                                                                                                                                                                                                                                              |
| TEKT3            | 17p12     | NM_031898    | c.1272_1280del p.V424_E426del    | +/-     | NR                | NR        | N/A               | No known disease association                                                                                                                                                            | N/A                                                                                                                                                                                                                                                                                                                                                                                                                                                                                                                                                                                                                                                                                                                                                                                                                                                                                                                                                                                       |
| CRIPAK           | 4p16.3    | NM_175918    | c.818_819insAT p.T273NfsX157     | +/-     | NR                | NR        | N/A               | No known disease association                                                                                                                                                            | N/A                                                                                                                                                                                                                                                                                                                                                                                                                                                                                                                                                                                                                                                                                                                                                                                                                                                                                                                                                                                       |
| KRTAP4-3         | 17q12-q21 | NM_033187    | c.826T>C p.C276R                 | +/-     | benign            | tolerated | N/A               | No known disease association                                                                                                                                                            | N/A                                                                                                                                                                                                                                                                                                                                                                                                                                                                                                                                                                                                                                                                                                                                                                                                                                                                                                                                                                                       |
| KRTAP5-5         | 11p15.5   | NM_001001480 | c.302G>A p.R101H                 | +/-     | benign            | tolerated | N/A               | No known disease association                                                                                                                                                            | N/A                                                                                                                                                                                                                                                                                                                                                                                                                                                                                                                                                                                                                                                                                                                                                                                                                                                                                                                                                                                       |
|                  |           |              | c.195_196ins15 p.C65X            | +/-     | NR                | NR        | N/A               |                                                                                                                                                                                         |                                                                                                                                                                                                                                                                                                                                                                                                                                                                                                                                                                                                                                                                                                                                                                                                                                                                                                                                                                                           |
| KRTAP5-5         | 11p15.5   | NM_001001480 | c.87_158del p.G30_C52del         | +/-     | NR                | NR        | N/A               | No known disease association                                                                                                                                                            | N/A                                                                                                                                                                                                                                                                                                                                                                                                                                                                                                                                                                                                                                                                                                                                                                                                                                                                                                                                                                                       |
|                  |           |              | c.130_138del p.G44_G46del        | +/-     | NR                | NR        | N/A               |                                                                                                                                                                                         |                                                                                                                                                                                                                                                                                                                                                                                                                                                                                                                                                                                                                                                                                                                                                                                                                                                                                                                                                                                           |

|           |                                       |           |                                       |           |                     |           |                     |                               |                                                                                                                                                                  |
|-----------|---------------------------------------|-----------|---------------------------------------|-----------|---------------------|-----------|---------------------|-------------------------------|------------------------------------------------------------------------------------------------------------------------------------------------------------------|
| MUC5B     | 11p15.5                               | NM_002458 | c.7744A>G p.T2582A                    | +/-       | benign              | tolerated | N/A                 | Idiopathic pulmonary fibrosis | An intronic minor allele (T) of SNP rs35705950 increases the susceptibility to pulmonary fibrosis (Seibold et al 2011; Zhang et al 2011; Hunninghake et al 2013) |
|           |                                       |           | c.11357_11434del p.T3787_Q3811del     | +/-       | NR                  | NR        | N/A                 |                               |                                                                                                                                                                  |
|           |                                       | NM_002458 | c.7744A>G p.T2582A                    | +/-       | benign              | tolerated | N/A                 |                               |                                                                                                                                                                  |
|           |                                       |           | c.11309T>C p.F3770S                   | +/-       | benign              | tolerated | N/A                 |                               |                                                                                                                                                                  |
|           |                                       | NM_002458 | c.7744A>G p.T2582A                    | +/-       | benign              | tolerated | N/A                 |                               |                                                                                                                                                                  |
|           |                                       |           | c.10246_10332del p.P3416_T3444del     | +/-       | NR                  | NR        | N/A                 |                               |                                                                                                                                                                  |
|           |                                       | NM_002458 | c.7744A>G p.T2582A                    | +/-       | benign              | tolerated | N/A                 |                               |                                                                                                                                                                  |
|           |                                       |           | c.9929C>G p.T3310S                    | +/-       | benign              | tolerated | N/A                 |                               |                                                                                                                                                                  |
|           |                                       | NM_002458 | c.7744A>G p.T2582A                    | +/-       | benign              | tolerated | N/A                 |                               |                                                                                                                                                                  |
|           |                                       |           | c.9626G>A p.R3209K                    | +/-       | benign              | tolerated | N/A                 |                               |                                                                                                                                                                  |
|           |                                       | NM_002458 | c.7744A>G p.T2582A                    | +/-       | benign              | tolerated | N/A                 |                               |                                                                                                                                                                  |
|           |                                       |           | c.9353C>T p.A3118V                    | +/-       | benign              | tolerated | N/A                 |                               |                                                                                                                                                                  |
|           |                                       | NM_002458 | c.7744A>G p.T2582A                    | +/-       | benign              | tolerated | N/A                 |                               |                                                                                                                                                                  |
|           |                                       |           | c.8782C>G p.R2928G                    | +/-       | benign              | tolerated | N/A                 |                               |                                                                                                                                                                  |
|           |                                       | NM_002458 | c.7744A>G p.T2582A                    | +/-       | benign              | tolerated | N/A                 |                               |                                                                                                                                                                  |
|           |                                       |           | c.8063C>T p.P2688L                    | +/-       | benign              | tolerated | N/A                 |                               |                                                                                                                                                                  |
|           |                                       | NM_002458 | c.6875G>A p.R2292H                    | +/-       | benign              | tolerated | N/A                 |                               |                                                                                                                                                                  |
|           |                                       |           | c.13441_13442insTGC p.V4481_S4482insC | +/-       | NR                  | NR        | N/A                 |                               |                                                                                                                                                                  |
|           |                                       | NM_002458 | c.7744A>G p.T2582A                    | +/-       | benign              | tolerated | N/A                 |                               |                                                                                                                                                                  |
|           |                                       |           | c.11855C>A p.T3952N                   | +/-       | possibly damaging   | tolerated | Not reported in ESP |                               |                                                                                                                                                                  |
|           |                                       | NM_002458 | c.7744A>G p.T2582A                    | +/-       | benign              | tolerated | N/A                 |                               |                                                                                                                                                                  |
|           |                                       |           | c.13441_13442insTGC p.V4481_S4482insC | +/-       | NR                  | NR        | N/A                 |                               |                                                                                                                                                                  |
|           |                                       | NM_002458 | c.9353C>T p.A3118V                    | +/-       | benign              | tolerated | N/A                 |                               |                                                                                                                                                                  |
|           |                                       |           | c.13441_13442insTGC p.V4481_S4482insC | +/-       | NR                  | NR        | N/A                 |                               |                                                                                                                                                                  |
|           |                                       | NM_002458 | c.9353C>T p.A3118V                    | +/-       | benign              | tolerated | N/A                 |                               |                                                                                                                                                                  |
|           |                                       |           | c.11855C>A p.T3952N                   | +/-       | possibly damaging   | tolerated | Not reported in ESP |                               |                                                                                                                                                                  |
|           |                                       | NM_002458 | c.9353C>T p.A3118V                    | +/-       | benign              | tolerated | N/A                 |                               |                                                                                                                                                                  |
|           |                                       |           | c.11357_11434del p.T3787_Q3811del     | +/-       | NR                  | NR        | N/A                 |                               |                                                                                                                                                                  |
|           |                                       | NM_002458 | c.9353C>T p.A3118V                    | +/-       | benign              | tolerated | N/A                 |                               |                                                                                                                                                                  |
|           |                                       |           | c.11309T>C p.F3770S                   | +/-       | benign              | tolerated | N/A                 |                               |                                                                                                                                                                  |
|           |                                       | NM_002458 | c.9353C>T p.A3118V                    | +/-       | benign              | tolerated | N/A                 |                               |                                                                                                                                                                  |
|           |                                       |           | c.10246_10332del p.P3416_T3444del     | +/-       | NR                  | NR        | N/A                 |                               |                                                                                                                                                                  |
|           |                                       | NM_002458 | c.9353C>T p.A3118V                    | +/-       | benign              | tolerated | N/A                 |                               |                                                                                                                                                                  |
|           |                                       |           | c.9929C>G p.T3310S                    | +/-       | benign              | tolerated | N/A                 |                               |                                                                                                                                                                  |
|           |                                       | NM_002458 | c.9353C>T p.A3118V                    | +/-       | benign              | tolerated | N/A                 |                               |                                                                                                                                                                  |
|           |                                       |           | c.9626G>A p.R3209K                    | +/-       | benign              | tolerated | N/A                 |                               |                                                                                                                                                                  |
|           |                                       | NM_002458 | c.8782C>G p.R2928G                    | +/-       | benign              | tolerated | N/A                 |                               |                                                                                                                                                                  |
|           |                                       |           | c.9353C>T p.A3118V                    | +/-       | benign              | tolerated | N/A                 |                               |                                                                                                                                                                  |
|           |                                       | NM_002458 | c.8063C>T p.P2688L                    | +/-       | benign              | tolerated | N/A                 |                               |                                                                                                                                                                  |
|           |                                       |           | c.9353C>T p.A3118V                    | +/-       | benign              | tolerated | N/A                 |                               |                                                                                                                                                                  |
|           |                                       | NM_002458 | c.6875G>A p.R2292H                    | +/-       | benign              | tolerated | N/A                 |                               |                                                                                                                                                                  |
|           |                                       |           | c.11855C>A p.T3952N                   | +/-       | possibly damaging   | tolerated | Not reported in ESP |                               |                                                                                                                                                                  |
|           |                                       | NM_002458 | c.6875G>A p.R2292H                    | +/-       | benign              | tolerated | N/A                 |                               |                                                                                                                                                                  |
|           |                                       |           | c.11357_11434del p.T3787_Q3811del     | +/-       | NR                  | NR        | N/A                 |                               |                                                                                                                                                                  |
|           |                                       | NM_002458 | c.6845_6850del p.T2283_T2283del       | +/-       | NR                  | NR        | N/A                 |                               |                                                                                                                                                                  |
|           |                                       |           | c.11309T>C p.F3770S                   | +/-       | benign              | tolerated | N/A                 |                               |                                                                                                                                                                  |
|           |                                       | NM_002458 | c.6845_6850del p.T2283_T2283del       | +/-       | NR                  | NR        | N/A                 |                               |                                                                                                                                                                  |
|           |                                       |           | c.10246_10332del p.P3416_T3444del     | +/-       | NR                  | NR        | N/A                 |                               |                                                                                                                                                                  |
|           |                                       | NM_002458 | c.6845_6850del p.T2283_T2283del       | +/-       | NR                  | NR        | N/A                 |                               |                                                                                                                                                                  |
|           |                                       |           | c.9929C>G p.T3310S                    | +/-       | benign              | tolerated | N/A                 |                               |                                                                                                                                                                  |
| NM_002458 | c.6845_6850del p.T2283_T2283del       | +/-       | NR                                    | NR        | N/A                 |           |                     |                               |                                                                                                                                                                  |
|           | c.9626G>A p.R3209K                    | +/-       | benign                                | tolerated | N/A                 |           |                     |                               |                                                                                                                                                                  |
| NM_002458 | c.6845_6850del p.T2283_T2283del       | +/-       | NR                                    | NR        | N/A                 |           |                     |                               |                                                                                                                                                                  |
|           | c.9353C>T p.A3118V                    | +/-       | benign                                | tolerated | N/A                 |           |                     |                               |                                                                                                                                                                  |
| NM_002458 | c.6845_6850del p.T2283_T2283del       | +/-       | NR                                    | NR        | N/A                 |           |                     |                               |                                                                                                                                                                  |
|           | c.6845_6850del p.T2283_T2283del       | +/-       | benign                                | tolerated | N/A                 |           |                     |                               |                                                                                                                                                                  |
| NM_002458 | c.6845_6850del p.T2283_T2283del       | +/-       | NR                                    | NR        | N/A                 |           |                     |                               |                                                                                                                                                                  |
|           | c.8782C>G p.R2928G                    | +/-       | benign                                | tolerated | N/A                 |           |                     |                               |                                                                                                                                                                  |
| NM_002458 | c.6845_6850del p.T2283_T2283del       | +/-       | NR                                    | NR        | N/A                 |           |                     |                               |                                                                                                                                                                  |
|           | c.8063C>T p.P2688L                    | +/-       | benign                                | tolerated | N/A                 |           |                     |                               |                                                                                                                                                                  |
| NM_002458 | c.6845_6850del p.T2283_T2283del       | +/-       | NR                                    | NR        | N/A                 |           |                     |                               |                                                                                                                                                                  |
|           | c.7744A>G p.T2582A                    | +/-       | benign                                | tolerated | N/A                 |           |                     |                               |                                                                                                                                                                  |
| NM_002458 | c.6845_6850del p.T2283_T2283del       | +/-       | NR                                    | NR        | N/A                 |           |                     |                               |                                                                                                                                                                  |
|           | c.6875G>A p.R2292H                    | +/-       | benign                                | tolerated | N/A                 |           |                     |                               |                                                                                                                                                                  |
| NM_002458 | c.6845_6850del p.T2283_T2283del       | +/-       | NR                                    | NR        | N/A                 |           |                     |                               |                                                                                                                                                                  |
|           | c.11357_11434del p.T3787_Q3811del     | +/-       | NR                                    | NR        | N/A                 |           |                     |                               |                                                                                                                                                                  |
| NM_002458 | c.6845_6850del p.T2283_T2283del       | +/-       | NR                                    | NR        | N/A                 |           |                     |                               |                                                                                                                                                                  |
|           | c.11855C>A p.T3952N                   | +/-       | possibly damaging                     | tolerated | Not reported in ESP |           |                     |                               |                                                                                                                                                                  |
| NM_002458 | c.6875G>A p.R2292H                    | +/-       | benign                                | tolerated | N/A                 |           |                     |                               |                                                                                                                                                                  |
|           | c.11309T>C p.F3770S                   | +/-       | benign                                | tolerated | N/A                 |           |                     |                               |                                                                                                                                                                  |
| NM_002458 | c.6875G>A p.R2292H                    | +/-       | benign                                | tolerated | N/A                 |           |                     |                               |                                                                                                                                                                  |
|           | c.10246_10332del p.P3416_T3444del     | +/-       | NR                                    | NR        | N/A                 |           |                     |                               |                                                                                                                                                                  |
| NM_002458 | c.6875G>A p.R2292H                    | +/-       | benign                                | tolerated | N/A                 |           |                     |                               |                                                                                                                                                                  |
|           | c.9929C>G p.T3310S                    | +/-       | benign                                | tolerated | N/A                 |           |                     |                               |                                                                                                                                                                  |
| NM_002458 | c.6875G>A p.R2292H                    | +/-       | benign                                | tolerated | N/A                 |           |                     |                               |                                                                                                                                                                  |
|           | c.9626G>A p.R3209K                    | +/-       | benign                                | tolerated | N/A                 |           |                     |                               |                                                                                                                                                                  |
| NM_002458 | c.6875G>A p.R2292H                    | +/-       | benign                                | tolerated | N/A                 |           |                     |                               |                                                                                                                                                                  |
|           | c.9353C>T p.A3118V                    | +/-       | benign                                | tolerated | N/A                 |           |                     |                               |                                                                                                                                                                  |
| NM_002458 | c.6875G>A p.R2292H                    | +/-       | benign                                | tolerated | N/A                 |           |                     |                               |                                                                                                                                                                  |
|           | c.8782C>G p.R2928G                    | +/-       | benign                                | tolerated | N/A                 |           |                     |                               |                                                                                                                                                                  |
| NM_002458 | c.6875G>A p.R2292H                    | +/-       | benign                                | tolerated | N/A                 |           |                     |                               |                                                                                                                                                                  |
|           | c.8063C>T p.P2688L                    | +/-       | benign                                | tolerated | N/A                 |           |                     |                               |                                                                                                                                                                  |
| NM_002458 | c.6875G>A p.R2292H                    | +/-       | benign                                | tolerated | N/A                 |           |                     |                               |                                                                                                                                                                  |
|           | c.7744A>G p.T2582A                    | +/-       | benign                                | tolerated | N/A                 |           |                     |                               |                                                                                                                                                                  |
| NM_002458 | c.6845_6850del p.T2283_T2283del       | +/-       | NR                                    | NR        | N/A                 |           |                     |                               |                                                                                                                                                                  |
|           | c.13441_13442insTGC p.V4481_S4482insC | +/-       | NR                                    | NR        | N/A                 |           |                     |                               |                                                                                                                                                                  |

|                                                                                                                                         |          |              |                                        |            |                   |                        |                     |                              |     |
|-----------------------------------------------------------------------------------------------------------------------------------------|----------|--------------|----------------------------------------|------------|-------------------|------------------------|---------------------|------------------------------|-----|
| PRAMEF1                                                                                                                                 | 1p36.21  | NM_023013    | c.1069G>A p.E357K<br>c.1102G>A p.A368T | +/-<br>+/- | benign<br>benign  | tolerated<br>tolerated | N/A<br>N/A          | No known disease association | N/A |
| PRAMEF11                                                                                                                                | 1p36.21  | NM_001146344 | c.929C>T p.A310V                       | +/-        | possibly damaging | damaging               | Not reported in ESP | No known disease association | N/A |
|                                                                                                                                         |          |              | c.458G>A p.R153H                       | +/-        | benign            | tolerated              | N/A                 |                              |     |
|                                                                                                                                         |          |              | c.929C>T p.A310V                       | +/-        | possibly damaging | damaging               | Not reported in ESP |                              |     |
|                                                                                                                                         |          |              | c.604A>G p.M202V                       | +/-        | benign            | tolerated              | N/A                 |                              |     |
|                                                                                                                                         |          |              | c.929C>T p.A310V                       | +/-        | possibly damaging | damaging               | Not reported in ESP |                              |     |
| PRAMEF2                                                                                                                                 | 1p36.21  | NM_001146344 | c.640_642del p.K214del                 | +/-        | NR                | NR                     | N/A                 | No known disease association | N/A |
|                                                                                                                                         |          |              | c.929C>T p.A310V                       | +/-        | possibly damaging | damaging               | Not reported in ESP |                              |     |
|                                                                                                                                         |          |              | c.736G>A p.D246N                       | +/-        | probably damaging | tolerated              | Not reported in ESP |                              |     |
|                                                                                                                                         |          |              | c.878A>T p.N293I                       | +/-        | benign            | tolerated              | N/A                 |                              |     |
|                                                                                                                                         |          |              | c.1158C>A p.S386R                      | +/-        | benign            | tolerated              | N/A                 |                              |     |
| PRAMEF2                                                                                                                                 | 1p36.21  | NM_023014    | c.879C>G p.N293K                       | +/-        | possibly damaging | damaging               | Not reported in ESP | No known disease association | N/A |
|                                                                                                                                         |          |              | c.1158C>A p.S386R                      | +/-        | benign            | tolerated              | N/A                 |                              |     |
|                                                                                                                                         |          |              | c.1102G>A p.A368T                      | +/-        | benign            | tolerated              | N/A                 |                              |     |
|                                                                                                                                         |          |              | c.1158C>A p.S386R                      | +/-        | benign            | tolerated              | N/A                 |                              |     |
| RBM12                                                                                                                                   | 20q11.21 | NM_006047    | c.2504_2505ins6 p.P835_G836insAP       | +/-        | NR                | NR                     | N/A                 | No known disease association | N/A |
|                                                                                                                                         |          |              | c.1187G>C p.G396A                      | +/-        | benign            | tolerated              | N/A                 |                              |     |
| VSIG10                                                                                                                                  | 12q24.23 | NM_019086    | c.1419_1421del p.E473del               | +/-        | NR                | NR                     | N/A                 | No known disease association | N/A |
|                                                                                                                                         |          |              | c.1046_1063del p.T349_I354del          | +/-        | NR                | NR                     | N/A                 |                              |     |
| KRT76                                                                                                                                   | 12q13.13 | NM_015848    | c.1024A>T p.M342L                      | +/+        | possibly damaging | damaging               | AA=0/AT=6/TT=6497   | No known disease association | N/A |
| NR = Not reported, N/A = Not applicable                                                                                                 |          |              |                                        |            |                   |                        |                     |                              |     |
| *If variant denoted as damaging in Poly Phen and/or SIFT, then reported genotype frequency from NHLBI GO Exome Sequencing Project (ESP) |          |              |                                        |            |                   |                        |                     |                              |     |

| <b>Table S2</b> |             |           |             |
|-----------------|-------------|-----------|-------------|
| Ensembl ID      | Gene symbol | Entrez ID | Correlation |
| ENSG00000117139 | KDM5B       | 10765     | 0.9561      |
| ENSG00000181827 | RFX7        | 64864     | 0.9536      |
| ENSG00000163939 | PBRM1       | 55193     | 0.9527      |
| ENSG00000143702 | CEP170      | 9859      | 0.9525      |
| ENSG00000178163 | ZNF518B     | 85460     | 0.9525      |
| ENSG00000106346 | USP42       | 84132     | 0.9517      |
| ENSG00000138439 | FAM117B     | 150864    | 0.9513      |
| ENSG00000159579 | RSPRY1      | 89970     | 0.9472      |
| ENSG00000155592 | ZKSCAN2     | 342357    | 0.9463      |
| ENSG00000100426 | ZBED4       | 9889      | 0.9444      |
| ENSG00000134313 | KIDINS220   | 57498     | 0.9443      |
| ENSG00000197024 | ZNF398      | 57541     | 0.9434      |
| ENSG00000196632 | WNK3        | 65267     | 0.9433      |
| ENSG00000077097 | TOP2B       | 7155      | 0.9432      |
| ENSG00000198824 | CHAMP1      | 283489    | 0.9432      |
| ENSG00000160208 | RRP1B       | 23076     | 0.9430      |
| ENSG00000110066 | SUV420H1    | 51111     | 0.9429      |
| ENSG00000011007 | TCEB3       | 6924      | 0.9418      |
| ENSG00000089902 | RCOR1       | 23186     | 0.9415      |
| ENSG00000175087 | PDIK1L      | 149420    | 0.9412      |
| ENSG00000243943 | ZNF512      | 84450     | 0.9411      |
| ENSG00000089094 | KDM2B       | 84678     | 0.9409      |
| ENSG00000187607 | ZNF286A     | 57335     | 0.9404      |
| ENSG00000162613 | FUBP1       | 8880      | 0.9398      |
| ENSG00000183309 | ZNF623      | 9831      | 0.9397      |
| ENSG00000103160 | HSDL1       | 83693     | 0.9388      |
| ENSG00000169118 | CSNK1G1     | 53944     | 0.9379      |
| ENSG00000102974 | CTCF        | 10664     | 0.9377      |
| ENSG00000118263 | KLF7        | 8609      | 0.9374      |
| ENSG00000066135 | KDM4A       | 9682      | 0.9372      |
| ENSG00000120616 | EPC1        | 80314     | 0.9370      |
| ENSG00000124571 | XPO5        | 57510     | 0.9367      |
| ENSG00000163026 | C2orf44     | 80304     | 0.9365      |
| ENSG00000152443 | ZNF776      | 284309    | 0.9358      |
| ENSG00000144233 | AMMECR1L    | 83607     | 0.9346      |
| ENSG00000112182 | BACH2       | 60468     | 0.9341      |
| ENSG00000170558 | CDH2        | 1000      | 0.9331      |
| ENSG00000103194 | USP10       | 9100      | 0.9331      |
| ENSG00000172939 | OXSRI       | 9943      | 0.9316      |
| ENSG00000188994 | ZNF292      | 23036     | 0.9314      |
| ENSG00000125686 | MED1        | 5469      | 0.9313      |
| ENSG00000141424 | SLC39A6     | 25800     | 0.9312      |
| ENSG00000181007 | ZFP82       | 284406    | 0.9306      |
| ENSG00000171681 | ATF7IP      | 55729     | 0.9304      |
| ENSG00000163214 | DHX57       | 90957     | 0.9298      |
| ENSG00000198040 | ZNF84       | 7637      | 0.9290      |
| ENSG00000131023 | LATS1       | 9113      | 0.9289      |

|                 |           |        |        |
|-----------------|-----------|--------|--------|
| ENSG00000163104 | SMARCA1   | 56916  | 0.9286 |
| ENSG00000122779 | TRIM24    | 8805   | 0.9284 |
| ENSG00000158636 | C11orf30  | 56946  | 0.9282 |
| ENSG00000100281 | HMGXB4    | 10042  | 0.9282 |
| ENSG00000004487 | KDM1A     | 23028  | 0.9280 |
| ENSG00000121406 | ZNF549    | 256051 | 0.9279 |
| ENSG00000213079 | SCAF8     | 22828  | 0.9277 |
| ENSG00000151458 | ANKRD50   | 57182  | 0.9275 |
| ENSG00000105866 | SP4       | 6671   | 0.9272 |
| ENSG00000121774 | KHDRBS1   | 10657  | 0.9271 |
| ENSG00000171456 | ASXL1     | 171023 | 0.9268 |
| ENSG00000164091 | WDR82     | 80335  | 0.9266 |
| ENSG00000143079 | CTTNBP2NL | 55917  | 0.9263 |
| ENSG00000113300 | CNOT6     | 57472  | 0.9263 |
| ENSG00000011258 | MBTD1     | 54799  | 0.9260 |
| ENSG00000125944 | HNRNPR    | 10236  | 0.9252 |
| ENSG00000127483 | HP1BP3    | 50809  | 0.9251 |
| ENSG00000204611 | ZNF616    | 90317  | 0.9248 |
| ENSG00000244462 | RBM12     | 10137  | 0.9245 |
| ENSG00000143061 | IGSF3     | 3321   | 0.9242 |
| ENSG00000088930 | XRN2      | 22803  | 0.9242 |
| ENSG00000085721 | RRN3      | 54700  | 0.9242 |
| ENSG00000185219 | ZNF445    | 353274 | 0.9240 |
| ENSG00000147180 | ZNF711    | 7552   | 0.9237 |
| ENSG00000198553 | KCNRG     | 283518 | 0.9236 |
| ENSG00000242852 | ZNF709    | 163051 | 0.9235 |
| ENSG00000177932 | ZNF354C   | 30832  | 0.9235 |
| ENSG00000079387 | SENP1     | 29843  | 0.9232 |
| ENSG00000179837 | RBM15B    | 29890  | 0.9231 |
| ENSG00000204178 | TMEM57    | 55219  | 0.9223 |
| ENSG00000025293 | PHF20     | 51230  | 0.9216 |
| ENSG00000184675 | FAM123B   | 139285 | 0.9216 |
| ENSG00000109685 | WHSC1     | 7468   | 0.9216 |
| ENSG00000188636 | LDOC1L    | 84247  | 0.9215 |
| ENSG00000198492 | YTHDF2    | 51441  | 0.9215 |
| ENSG00000213799 | ZNF845    | 91664  | 0.9214 |
| ENSG00000198182 | ZNF607    | 84775  | 0.9213 |
| ENSG00000171843 | MLLT3     | 4300   | 0.9211 |
| ENSG00000131845 | ZNF304    | 57343  | 0.9209 |
| ENSG00000116128 | BCL9      | 607    | 0.9203 |
| ENSG00000186448 | ZNF197    | 10168  | 0.9201 |
| ENSG00000117000 | RLF       | 6018   | 0.9200 |
| ENSG00000130396 | MLLT4     | 4301   | 0.9199 |
| ENSG00000204519 | ZNF551    | 90233  | 0.9198 |
| ENSG00000177733 | HNRNPA0   | 10949  | 0.9196 |
| ENSG00000074054 | CLASP1    | 23332  | 0.9192 |
| ENSG00000162415 | ZSWIM5    | 57643  | 0.9188 |
| ENSG00000107341 | UBE2R2    | 54926  | 0.9188 |
| ENSG00000135999 | EPC2      | 26122  | 0.9187 |



|                 |          |        |        |
|-----------------|----------|--------|--------|
| ENSG00000130803 | ZNF317   | 57693  | 0.9187 |
| ENSG00000136485 | DCAF7    | 10238  | 0.9185 |
| ENSG00000037749 | MFAP3    | 4238   | 0.9181 |
| ENSG00000145041 | VPRBP    | 9730   | 0.9180 |
| ENSG00000124459 | ZNF45    | 7596   | 0.9179 |
| ENSG00000168795 | ZBTB5    | 9925   | 0.9179 |
| ENSG00000125630 | POLR1B   | 84172  | 0.9177 |
| ENSG00000135387 | CAPRIN1  | 4076   | 0.9176 |
| ENSG00000186300 | ZNF555   | 148254 | 0.9161 |
| ENSG00000110218 | PANX1    | 24145  | 0.9157 |
| ENSG00000156531 | PHF6     | 84295  | 0.9156 |
| ENSG00000177125 | ZBTB34   | 403341 | 0.9156 |
| ENSG00000136381 | IREB2    | 3658   | 0.9156 |
| ENSG00000204977 | TRIM13   | 10206  | 0.9151 |
| ENSG00000073711 | PPP2R3A  | 5523   | 0.9150 |
| ENSG00000137574 | TGS1     | 96764  | 0.9143 |
| ENSG00000135747 | ZNF670   | 93474  | 0.9141 |
| ENSG00000101266 | CSNK2A1  | 1457   | 0.9134 |
| ENSG00000140598 | EFTUD1   | 79631  | 0.9129 |
| ENSG00000139990 | DCAF5    | 8816   | 0.9129 |
| ENSG00000196470 | SIAH1    | 6477   | 0.9129 |
| ENSG00000168246 | UBTD2    | 92181  | 0.9127 |
| ENSG00000166261 | ZNF202   | 7753   | 0.9127 |
| ENSG00000205268 | PDE7A    | 5150   | 0.9126 |
| ENSG00000114302 | PRKAR2A  | 5576   | 0.9126 |
| ENSG00000213762 | ZNF134   | 7693   | 0.9126 |
| ENSG00000152217 | SETBP1   | 26040  | 0.9126 |
| ENSG00000164244 | PRRC1    | 133619 | 0.9125 |
| ENSG00000197128 | ZNF772   | 400720 | 0.9124 |
| ENSG00000196150 | ZNF250   | 58500  | 0.9123 |
| ENSG00000196867 | ZFP28    | 140612 | 0.9122 |
| ENSG00000101193 | C20orf11 | 54994  | 0.9121 |
| ENSG00000184402 | SS18L1   | 26039  | 0.9120 |
| ENSG00000130559 | CAMSAP1  | 157922 | 0.9119 |
| ENSG00000143324 | XPR1     | 9213   | 0.9119 |
| ENSG00000092201 | SUPT16H  | 11198  | 0.9117 |
| ENSG00000147548 | WHSC1L1  | 54904  | 0.9117 |
| ENSG00000156853 | ZNF689   | 115509 | 0.9116 |
| ENSG00000110321 | EIF4G2   | 1982   | 0.9113 |
| ENSG00000174579 | MSL2     | 55167  | 0.9110 |
| ENSG00000135829 | DHX9     | 1660   | 0.9109 |
| ENSG00000176624 | MEX3C    | 51320  | 0.9108 |
| ENSG00000132436 | FIGNL1   | 63979  | 0.9107 |
| ENSG00000167785 | ZNF558   | 148156 | 0.9107 |
| ENSG00000176371 | ZSCAN2   | 54993  | 0.9102 |
| ENSG00000159131 | GART     | 2618   | 0.9102 |
| ENSG00000189091 | SF3B3    | 23450  | 0.9101 |
| ENSG00000179409 | GEMIN4   | 50628  | 0.9100 |
| ENSG00000113569 | NUP155   | 9631   | 0.9099 |

|                 |         |        |        |
|-----------------|---------|--------|--------|
| ENSG00000162419 | GMEB1   | 10691  | 0.9098 |
| ENSG00000109171 | SLAIN2  | 57606  | 0.9092 |
| ENSG00000137942 | FNBP1L  | 54874  | 0.9090 |
| ENSG00000110987 | BCL7A   | 605    | 0.9090 |
| ENSG00000136709 | WDR33   | 55339  | 0.9086 |
| ENSG0000018699  | TTC27   | 55622  | 0.9084 |
| ENSG00000160062 | ZBTB8A  | 653121 | 0.9078 |
| ENSG00000143494 | VASH2   | 79805  | 0.9076 |
| ENSG00000171649 | ZIK1    | 284307 | 0.9075 |
| ENSG00000115421 | PAPOLG  | 64895  | 0.9073 |
| ENSG00000124214 | STAU1   | 6780   | 0.9071 |
| ENSG00000065183 | WDR3    | 10885  | 0.9071 |
| ENSG00000160199 | PKNOX1  | 5316   | 0.9069 |
| ENSG00000179151 | EDC3    | 80153  | 0.9063 |
| ENSG00000124789 | NUP153  | 9972   | 0.9061 |
| ENSG00000132155 | RAF1    | 5894   | 0.9059 |
| ENSG00000213551 | DNAJC9  | 23234  | 0.9058 |
| ENSG00000189079 | ARID2   | 196528 | 0.9058 |
| ENSG00000066117 | SMARCD1 | 6602   | 0.9058 |
| ENSG00000030066 | NUP160  | 23279  | 0.9057 |
| ENSG00000125484 | GTF3C4  | 9329   | 0.9054 |
| ENSG00000188295 | ZNF669  | 79862  | 0.9052 |
| ENSG00000196652 | ZKSCAN5 | 23660  | 0.9051 |
| ENSG00000112685 | EXOC2   | 55770  | 0.9050 |
| ENSG00000196267 | ZNF836  | 162962 | 0.9048 |
| ENSG00000056277 | ZNF280C | 55609  | 0.9048 |
| ENSG00000147316 | MCPH1   | 79648  | 0.9044 |
| ENSG00000136866 | ZFP37   | 7539   | 0.9041 |
| ENSG00000142065 | ZFP14   | 57677  | 0.9032 |
| ENSG00000114742 | WDR48   | 57599  | 0.9031 |
| ENSG00000110880 | CORO1C  | 23603  | 0.9030 |
| ENSG00000079246 | XRCC5   | 7520   | 0.9030 |
| ENSG00000143379 | SETDB1  | 9869   | 0.9029 |
| ENSG00000198205 | ZXDA    | 7789   | 0.9029 |
| ENSG00000136891 | TEX10   | 54881  | 0.9027 |
| ENSG00000151846 | PABPC3  | 5042   | 0.9026 |
| ENSG00000158691 | ZSCAN12 | 9753   | 0.9025 |
| ENSG00000145725 | PIIP5K2 | 23262  | 0.9019 |
| ENSG00000131473 | ACLY    | 47     | 0.9019 |
| ENSG00000077279 | DCX     | 1641   | 0.9016 |
| ENSG00000129351 | ILF3    | 3609   | 0.9014 |
| ENSG00000166704 | ZNF606  | 80095  | 0.9012 |
| ENSG00000180370 | PAK2    | 5062   | 0.9006 |
| ENSG00000142556 | ZNF614  | 80110  | 0.9004 |
| ENSG00000086848 | ALG9    | 79796  | 0.9003 |
| ENSG00000081386 | ZNF510  | 22869  | 0.9002 |
| ENSG00000021574 | SPAST   | 6683   | 0.9000 |

| <b>Table S3</b> |             |           |             |
|-----------------|-------------|-----------|-------------|
| Ensembl ID      | Gene symbol | Entrez ID | Correlation |
| ENSG00000197971 | MBP         | 4155      | -0.9038     |
| ENSG00000107902 | LHPP        | 64077     | -0.8995     |
| ENSG00000160781 | PAQR6       | 79957     | -0.8984     |
| ENSG00000090581 | GNPTG       | 84572     | -0.8977     |
| ENSG00000159176 | CSRP1       | 1465      | -0.8928     |
| ENSG00000105643 | ARRDC2      | 27106     | -0.8916     |
| ENSG00000250479 | CHCHD10     | 400916    | -0.8899     |
| ENSG00000116661 | FBXO2       | 26232     | -0.8896     |
| ENSG00000021300 | PLEKHB1     | 58473     | -0.8873     |
| ENSG00000189171 | S100A13     | 6284      | -0.8864     |
| ENSG00000167641 | PPP1R14A    | 94274     | -0.8816     |
| ENSG00000160307 | S100B       | 6285      | -0.8803     |
| ENSG00000063180 | CA11        | 770       | -0.8801     |
| ENSG00000100003 | SEC14L2     | 23541     | -0.8796     |
| ENSG00000101400 | SNTA1       | 6640      | -0.8766     |
| ENSG00000120306 | C5orf32     | 84418     | -0.8761     |
|                 | TNFSF12-    |           |             |
| ENSG00000248871 | TNFSF13     | 407977    | -0.8741     |
| ENSG00000103740 | ACSBG1      | 23205     | -0.8740     |
| ENSG00000173267 | SNCG        | 6623      | -0.8722     |
| ENSG00000165795 | NDRG2       | 57447     | -0.8713     |
| ENSG00000145198 | VWA5B2      | 90113     | -0.8706     |
| ENSG00000102934 | PLLP        | 51090     | -0.8676     |
| ENSG00000198892 | SHISA4      | 149345    | -0.8657     |
| ENSG00000101439 | CST3        | 1471      | -0.8655     |
| ENSG00000176485 | PLA2G16     | 11145     | -0.8654     |
| ENSG00000109107 | ALDOC       | 230       | -0.8651     |
| ENSG00000087250 | MT3         | 4504      | -0.8650     |
| ENSG00000161955 | TNFSF13     | 8741      | -0.8639     |
| ENSG00000131097 | HIGD1B      | 51751     | -0.8631     |
| ENSG00000166091 | CMTM5       | 116173    | -0.8622     |
| ENSG00000130303 | BST2        | 684       | -0.8619     |
| ENSG00000244274 | DBNDD2      | 55861     | -0.8604     |
| ENSG00000167705 | RILP        | 83547     | -0.8592     |
| ENSG00000174939 | ASPHD1      | 253982    | -0.8565     |
| ENSG00000163517 | HDAC11      | 79885     | -0.8564     |
| ENSG00000239697 | TNFSF12     | 8742      | -0.8547     |
| ENSG00000103811 | CTSH        | 1512      | -0.8545     |
| ENSG00000160408 | ST6GALNAC6  | 30815     | -0.8535     |
| ENSG00000124615 | MOCS1       | 4337      | -0.8519     |
| ENSG00000189058 | APOD        | 347       | -0.8498     |
| ENSG00000234745 | HLA-B       | 3106      | -0.8496     |
| ENSG00000182902 | SLC25A18    | 83733     | -0.8484     |
| ENSG00000166925 | TSC22D4     | 81628     | -0.8480     |
| ENSG00000148120 | C9orf3      | 84909     | -0.8479     |
| ENSG00000129250 | KIF1C       | 10749     | -0.8472     |
| ENSG00000198835 | GJC2        | 57165     | -0.8468     |

|                 |              |           |         |
|-----------------|--------------|-----------|---------|
| ENSG00000198624 | CCDC69       | 26112     | -0.8462 |
| ENSG00000183401 | CCDC159      | 126075    | -0.8460 |
| ENSG00000109846 | CRYAB        | 1410      | -0.8452 |
| ENSG00000175482 | POLD4        | 57804     | -0.8451 |
| ENSG00000108387 | 5-Sep        | 5414      | -0.8440 |
| ENSG00000120885 | CLU          | 1191      | -0.8435 |
| ENSG00000131730 | CKMT2        | 1160      | -0.8433 |
| ENSG00000170634 | ACYP2        | 98        | -0.8427 |
| ENSG00000102760 | C13orf15     | 28984     | -0.8425 |
| ENSG00000149489 | ROM1         | 6094      | -0.8406 |
| ENSG00000091513 | TF           | 7018      | -0.8399 |
| ENSG00000244187 | TMEM141      | 85014     | -0.8398 |
| ENSG00000244607 | CCDC13       | 152206    | -0.8394 |
| ENSG00000135525 | MAP7         | 9053      | -0.8391 |
| ENSG00000078804 | TP53INP2     | 58476     | -0.8390 |
| ENSG00000161835 | GRASP        | 160622    | -0.8372 |
| ENSG00000183628 | DGCR6        | 8214      | -0.8371 |
| ENSG00000146122 | DAAM2        | 23500     | -0.8371 |
| ENSG00000158526 | TSR2         | 90121     | -0.8354 |
| ENSG00000128805 | ARHGAP22     | 58504     | -0.8353 |
| ENSG00000100399 | CHADL        | 150356    | -0.8352 |
| ENSG00000172216 | CEBPB        | 1051      | -0.8331 |
| ENSG00000139192 | TAPBPL       | 55080     | -0.8330 |
| ENSG00000180155 | LYNX1        | 66004     | -0.8327 |
| ENSG00000204592 | HLA-E        | 3133      | -0.8327 |
| ENSG00000211584 | SLC48A1      | 55652     | -0.8326 |
| ENSG00000175602 | CCDC85B      | 11007     | -0.8325 |
| ENSG00000166710 | B2M          | 567       | -0.8322 |
| ENSG00000164403 | SHROOM1      | 134549    | -0.8317 |
| ENSG00000160801 | PTH1R        | 5745      | -0.8307 |
| ENSG00000198832 | RP3-412A9.11 | 140606    | -0.8305 |
| ENSG00000172458 | IL17D        | 53342     | -0.8301 |
| ENSG00000100033 | PRODH        | 5625      | -0.8300 |
| ENSG00000135926 | TMBIM1       | 64114     | -0.8282 |
| ENSG00000245937 | CTC-228N24.3 | 644873    | -0.8277 |
| ENSG00000091428 | RAPGEF4      | 11069     | -0.8273 |
| ENSG00000114993 | RTKN         | 6242      | -0.8265 |
| ENSG00000189283 | FHIT         | 2272      | -0.8264 |
| ENSG00000125148 | MT2A         | 4502      | -0.8260 |
| ENSG00000164402 | 9-Sep        | 23176     | -0.8254 |
| ENSG00000105518 | TMEM205      | 374882    | -0.8252 |
| ENSG00000078814 | MYH7B        | 57644     | -0.8249 |
| ENSG00000130988 | RGN          | 9104      | -0.8243 |
| ENSG00000167106 | FAM102A      | 399665    | -0.8242 |
| ENSG00000134873 | CLDN10       | 9071      | -0.8241 |
| ENSG00000236830 | AP000689.8   | 100506428 | -0.8235 |
| ENSG00000240065 | PSMB9        | 5698      | -0.8229 |
| ENSG00000112561 | TFEB         | 7942      | -0.8228 |
| ENSG00000102032 | RENBP        | 5973      | -0.8228 |

|                 |          |        |         |
|-----------------|----------|--------|---------|
| ENSG00000084453 | SLCO1A2  | 6579   | -0.8228 |
| ENSG00000198121 | LPAR1    | 1902   | -0.8225 |
| ENSG00000123560 | PLP1     | 5354   | -0.8222 |
| ENSG00000175197 | DDIT3    | 1649   | -0.8221 |
| ENSG00000087076 | HSD17B14 | 51171  | -0.8215 |
| ENSG00000160685 | ZBTB7B   | 51043  | -0.8211 |
| ENSG00000148411 | NACC2    | 138151 | -0.8211 |
| ENSG00000149090 | PAMR1    | 25891  | -0.8197 |
| ENSG00000158315 | RHBDL2   | 54933  | -0.8192 |
| ENSG00000157873 | TNFRSF14 | 8764   | -0.8192 |
| ENSG00000159228 | CBR1     | 873    | -0.8192 |
| ENSG00000072952 | MRVI1    | 10335  | -0.8192 |
| ENSG00000196502 | SULT1A1  | 6817   | -0.8192 |
| ENSG00000104267 | CA2      | 760    | -0.8188 |
| ENSG00000037042 | TUBG2    | 27175  | -0.8186 |
| ENSG00000166411 | IDH3A    | 3419   | -0.8181 |
| ENSG00000012171 | SEMA3B   | 7869   | -0.8177 |
| ENSG00000182600 | C2orf82  | 389084 | -0.8177 |
| ENSG00000239382 | ALKBH6   | 84964  | -0.8171 |
| ENSG00000129538 | RNASE1   | 6035   | -0.8169 |
| ENSG00000067113 | PPAP2A   | 8611   | -0.8169 |
| ENSG00000182700 | IGIP     | 492311 | -0.8155 |
| ENSG00000127824 | TUBA4A   | 7277   | -0.8146 |
| ENSG00000130203 | APOE     | 348    | -0.8145 |
| ENSG00000161281 | COX7A1   | 1346   | -0.8144 |
| ENSG00000101335 | MYL9     | 10398  | -0.8143 |
| ENSG00000149091 | DGKZ     | 8525   | -0.8139 |
| ENSG00000126709 | IFI6     | 2537   | -0.8137 |
| ENSG00000010278 | CD9      | 928    | -0.8135 |
| ENSG00000152583 | SPARCL1  | 8404   | -0.8133 |
| ENSG00000129473 | BCL2L2   | 599    | -0.8131 |
| ENSG00000174080 | CTSF     | 8722   | -0.8117 |
| ENSG00000144040 | SFXN5    | 94097  | -0.8110 |
| ENSG00000184524 | CEND1    | 51286  | -0.8105 |
| ENSG00000100307 | CBX7     | 23492  | -0.8104 |
| ENSG00000013364 | MVP      | 9961   | -0.8101 |
| ENSG00000178980 | SEPW1    | 6415   | -0.8101 |
| ENSG00000106351 | AGFG2    | 3268   | -0.8101 |
| ENSG00000161714 | PLCD3    | 113026 | -0.8095 |
| ENSG00000042445 | RETSAT   | 54884  | -0.8085 |
| ENSG00000155324 | GRAMD3   | 65983  | -0.8083 |
| ENSG00000224877 | C17orf89 | 284184 | -0.8083 |
| ENSG00000036530 | CYP46A1  | 10858  | -0.8080 |
| ENSG00000156381 | ANKRD9   | 122416 | -0.8073 |
| ENSG00000137825 | ITPKA    | 3706   | -0.8072 |
| ENSG00000161642 | ZNF385A  | 25946  | -0.8060 |
| ENSG00000068079 | IFI35    | 3430   | -0.8059 |
| ENSG00000117691 | NENF     | 29937  | -0.8055 |
| ENSG00000080573 | COL5A3   | 50509  | -0.8052 |

|                 |         |        |         |
|-----------------|---------|--------|---------|
| ENSG00000122359 | ANXA11  | 311    | -0.8047 |
| ENSG00000184221 | OLIG1   | 116448 | -0.8043 |
| ENSG00000126860 | EVI2A   | 2123   | -0.8041 |
| ENSG00000198753 | PLXNB3  | 5365   | -0.8035 |
| ENSG00000135916 | ITM2C   | 81618  | -0.8035 |
| ENSG00000117266 | CDK18   | 5129   | -0.8033 |
| ENSG00000087842 | PIR     | 8544   | -0.8029 |
| ENSG00000100116 | GCAT    | 23464  | -0.8027 |
| ENSG00000182196 | ARL6IP4 | 51329  | -0.8025 |
| ENSG00000166033 | HTRA1   | 5654   | -0.8025 |
| ENSG00000105516 | DBP     | 1628   | -0.8022 |
| ENSG00000147576 | ADHFE1  | 137872 | -0.8017 |
| ENSG00000135929 | CYP27A1 | 1593   | -0.8014 |
| ENSG00000185043 | CIB1    | 10519  | -0.8013 |
| ENSG00000198171 | DDRGK1  | 65992  | -0.8005 |
| ENSG00000104825 | NFKBIB  | 4793   | -0.8002 |

**Table S4**

Enrichment Score: 22.21679332120849

| Term                                                    | PValue   | Fold<br>Enrichment | Bonferroni | Benjamini | FDR      |
|---------------------------------------------------------|----------|--------------------|------------|-----------|----------|
| nucleus                                                 | 6.55E-38 | 2.970245353        | 1.15E-35   | 1.15E-35  | 8.03E-35 |
| Transcription                                           | 1.85E-34 | 4.275328995        | 3.24E-32   | 1.62E-32  | 2.27E-31 |
| transcription regulation                                | 1.86E-33 | 4.269822989        | 3.25E-31   | 1.08E-31  | 2.28E-30 |
| GO:0006350~transcription                                | 3.37E-30 | 3.545436471        | 2.15E-27   | 2.15E-27  | 5.02E-27 |
| zinc-finger                                             | 6.14E-30 | 4.44291997         | 1.07E-27   | 2.68E-28  | 7.52E-27 |
| zinc finger region:C2H2-type 9                          | 9.39E-29 | 10.7581898         | 5.88E-26   | 5.88E-26  | 1.40E-25 |
| zinc finger region:C2H2-type 8                          | 3.58E-28 | 9.942940885        | 2.24E-25   | 1.12E-25  | 5.32E-25 |
| zinc finger region:C2H2-type 7                          | 5.85E-28 | 9.41759054         | 3.66E-25   | 1.22E-25  | 8.69E-25 |
| zinc finger region:C2H2-type 6                          | 1.08E-27 | 8.910779339        | 6.79E-25   | 1.70E-25  | 1.61E-24 |
| IPR007087:Zinc finger, C2H2-type                        | 1.99E-27 | 6.291521776        | 6.09E-25   | 6.09E-25  | 2.67E-24 |
| GO:0045449~regulation of transcription                  | 3.43E-27 | 3.028474929        | 2.18E-24   | 1.09E-24  | 5.10E-24 |
| IPR015880:Zinc finger, C2H2-like                        | 4.34E-27 | 6.188899715        | 1.33E-24   | 6.64E-25  | 5.82E-24 |
| zinc finger region:C2H2-type 4                          | 6.67E-27 | 7.914285714        | 4.17E-24   | 8.35E-25  | 9.91E-24 |
| zinc finger region:C2H2-type 3                          | 1.68E-26 | 7.478844485        | 1.05E-23   | 1.76E-24  | 2.50E-23 |
| zinc finger region:C2H2-type 5                          | 5.54E-25 | 7.894671623        | 3.47E-22   | 4.96E-23  | 8.23E-22 |
| GO:0003677~DNA binding                                  | 6.08E-25 | 3.128194731        | 1.42E-22   | 1.42E-22  | 7.81E-22 |
| zinc                                                    | 8.28E-25 | 3.579936721        | 1.45E-22   | 2.90E-23  | 1.02E-21 |
| IPR013087:Zinc finger, C2H2-type/integrase, DNA-binding | 3.13E-24 | 6.743988341        | 9.59E-22   | 3.20E-22  | 4.20E-21 |
| zinc finger region:C2H2-type 2                          | 6.22E-24 | 7.152072891        | 3.89E-21   | 4.86E-22  | 9.23E-21 |
| zinc finger region:C2H2-type 1                          | 7.48E-24 | 7.649827213        | 4.68E-21   | 5.20E-22  | 1.11E-20 |
| domain:KRAB                                             | 9.03E-24 | 10.35637789        | 5.65E-21   | 5.65E-22  | 1.34E-20 |
| dna-binding                                             | 9.21E-24 | 3.813744151        | 1.61E-21   | 2.69E-22  | 1.13E-20 |
| zinc finger region:C2H2-type 10                         | 1.09E-23 | 10.29436365        | 6.84E-21   | 6.22E-22  | 1.62E-20 |
| GO:0008270~zinc ion binding                             | 6.44E-23 | 3.039830353        | 1.51E-20   | 7.53E-21  | 8.28E-20 |
| IPR001909:Krueppel-associated box                       | 6.81E-23 | 9.175623574        | 2.08E-20   | 5.21E-21  | 9.13E-20 |
| SM00355:ZnF_C2H2                                        | 4.61E-22 | 4.539457175        | 4.06E-20   | 4.06E-20  | 4.99E-19 |
| metal-binding                                           | 3.81E-21 | 2.876476746        | 6.66E-19   | 9.52E-20  | 4.67E-18 |
| zinc finger region:C2H2-type 11                         | 8.36E-20 | 10.00915543        | 5.24E-17   | 4.36E-18  | 1.24E-16 |
| SM00349:KRAB                                            | 3.24E-19 | 6.730170497        | 2.85E-17   | 1.42E-17  | 3.51E-16 |
| GO:0046914~transition metal ion binding                 | 3.97E-19 | 2.586318585        | 9.29E-17   | 3.10E-17  | 5.11E-16 |
| zinc finger region:C2H2-type 12                         | 4.55E-17 | 10.0324389         | 2.85E-14   | 2.19E-15  | 6.77E-14 |
| zinc finger region:C2H2-type 13                         | 5.15E-17 | 11.57174445        | 3.22E-14   | 2.30E-15  | 7.65E-14 |
| GO:0051252~regulation of RNA metabolic process          | 2.79E-13 | 2.73909249         | 1.77E-10   | 5.91E-11  | 4.15E-10 |
| GO:0006355~regulation of transcription, DNA-dependent   | 1.55E-12 | 2.704305797        | 9.89E-10   | 2.47E-10  | 2.31E-09 |
| GO:0046872~metal ion binding                            | 2.41E-12 | 1.890185957        | 5.64E-10   | 1.41E-10  | 3.10E-09 |
| zinc finger region:C2H2-type 14                         | 3.56E-12 | 10.95005561        | 2.23E-09   | 1.48E-10  | 5.29E-09 |

|                                 |          |             |          |          |          |
|---------------------------------|----------|-------------|----------|----------|----------|
| GO:0043169~cation binding       | 4.28E-12 | 1.872546031 | 1.00E-09 | 2.00E-10 | 5.50E-09 |
| GO:0043167~ion binding          | 1.04E-11 | 1.845170918 | 2.44E-09 | 4.07E-10 | 1.34E-08 |
| zinc finger region:C2H2-type 15 | 8.94E-08 | 9.056147832 | 5.60E-05 | 3.50E-06 | 1.33E-04 |

Enrichment Score: 7.901711245751855

| Term                                                    | PValue   | Fold<br>Enrichment | Bonferroni | Benjamini | FDR         |
|---------------------------------------------------------|----------|--------------------|------------|-----------|-------------|
| GO:0031981~nuclear lumen                                | 5.67E-11 | 3.547569386        | 8.95E-09   | 8.95E-09  | 6.83E-08    |
| GO:0043228~non-membrane-bounded organelle               | 4.58E-09 | 2.461864407        | 7.24E-07   | 3.62E-07  | 5.52E-06    |
| GO:0043232~intracellular non-membrane-bounded organelle | 4.58E-09 | 2.461864407        | 7.24E-07   | 3.62E-07  | 5.52E-06    |
| GO:0070013~intracellular organelle lumen                | 1.05E-08 | 2.891498375        | 1.66E-06   | 5.53E-07  | 1.27E-05    |
| GO:0043233~organelle lumen                              | 1.84E-08 | 2.826360225        | 2.91E-06   | 7.27E-07  | 2.22E-05    |
| GO:0031974~membrane-enclosed lumen                      | 2.97E-08 | 2.771538583        | 4.69E-06   | 9.38E-07  | 3.58E-05    |
| GO:0005730~nucleolus                                    | 4.94E-08 | 4.466419736        | 7.80E-06   | 1.30E-06  | 5.95E-05    |
| GO:0005654~nucleoplasm                                  | 1.82E-06 | 3.534649632        | 2.87E-04   | 4.10E-05  | 0.002187243 |

Enrichment Score: 7.222013089662222

| Term                               | PValue   | Fold<br>Enrichment | Bonferroni | Benjamini | FDR         |
|------------------------------------|----------|--------------------|------------|-----------|-------------|
| chromatin regulator                | 3.27E-10 | 8.122686738        | 5.73E-08   | 6.36E-09  | 4.01E-07    |
| GO:0016568~chromatin modification  | 1.19E-07 | 5.312205488        | 7.56E-05   | 1.51E-05  | 1.77E-04    |
| GO:0006325~chromatin organization  | 3.95E-07 | 4.303663519        | 2.52E-04   | 4.19E-05  | 5.88E-04    |
| GO:0051276~chromosome organization | 8.44E-07 | 3.707268694        | 5.37E-04   | 7.68E-05  | 0.001256098 |

Enrichment Score: 7.160509555746129

| Term                            | PValue      | Fold<br>Enrichment | Bonferroni  | Benjamini   | FDR         |
|---------------------------------|-------------|--------------------|-------------|-------------|-------------|
| zinc finger region:C2H2-type 12 | 4.55E-17    | 10.0324389         | 2.85E-14    | 2.19E-15    | 6.77E-14    |
| zinc finger region:C2H2-type 13 | 5.15E-17    | 11.57174445        | 3.22E-14    | 2.30E-15    | 7.65E-14    |
| zinc finger region:C2H2-type 14 | 3.56E-12    | 10.95005561        | 2.23E-09    | 1.48E-10    | 5.29E-09    |
| zinc finger region:C2H2-type 15 | 8.94E-08    | 9.056147832        | 5.60E-05    | 3.50E-06    | 1.33E-04    |
| zinc finger region:C2H2-type 16 | 8.06E-07    | 9.818153799        | 5.05E-04    | 2.97E-05    | 0.001197551 |
| zinc finger region:C2H2-type 19 | 1.62E-05    | 12.87070707        | 0.010116411 | 5.65E-04    | 0.02412557  |
| zinc finger region:C2H2-type 17 | 1.76E-05    | 9.747179193        | 0.010960886 | 5.80E-04    | 0.026150343 |
| zinc finger region:C2H2-type 18 | 4.65E-05    | 10.72558923        | 0.028719093 | 0.001455917 | 0.069124222 |
| zinc finger region:C2H2-type 20 | 4.18E-04    | 14.04541446        | 0.230039257 | 0.010402149 | 0.618419055 |
| zinc finger region:C2H2-type 21 | 0.002061302 | 15.55799756        | 0.725198611 | 0.046714641 | 3.018716537 |
| zinc finger region:C2H2-type 22 | 0.02489012  | 12.1352381         | 0.99999986  | 0.325956132 | 31.23128575 |

Enrichment Score: 3.3107824634939407

| Term | PValue | Fold | Bonferroni | Benjamini | FDR |
|------|--------|------|------------|-----------|-----|
|------|--------|------|------------|-----------|-----|



|                                          |             | Enrichment  |             |             |             |
|------------------------------------------|-------------|-------------|-------------|-------------|-------------|
| domain:SCAN box                          | 2.42E-04    | 10.6449457  | 0.140325717 | 0.006552426 | 0.358158493 |
| IPR003309:Transcriptional regulator SCAN | 3.52E-04    | 9.796530432 | 0.102036025 | 0.013363077 | 0.470309493 |
| SM00431:SCAN                             | 0.001375961 | 7.185595568 | 0.11411481  | 0.029837776 | 1.480343682 |

Enrichment Score: 3.2230796608798102

| Term                               | PValue      | Fold<br>Enrichment | Bonferroni  | Benjamini   | FDR         |
|------------------------------------|-------------|--------------------|-------------|-------------|-------------|
| GO:0005694~chromosome              | 3.03E-05    | 4.405249205        | 0.004776254 | 5.98E-04    | 0.036503859 |
| GO:0044427~chromosomal part        | 1.56E-04    | 4.442120561        | 0.024344546 | 0.002734673 | 0.187769831 |
| GO:0000228~nuclear chromosome      | 0.003629998 | 5.773261066        | 0.437060511 | 0.050894038 | 4.287106481 |
| GO:0044454~nuclear chromosome part | 0.007468967 | 6.388444622        | 0.694108852 | 0.087089455 | 8.63711235  |

Enrichment Score: 2.3130380263222956

| Term                                                | PValue      | Fold<br>Enrichment | Bonferroni  | Benjamini   | FDR         |
|-----------------------------------------------------|-------------|--------------------|-------------|-------------|-------------|
| GO:0044427~chromosomal part                         | 1.56E-04    | 4.442120561        | 0.024344546 | 0.002734673 | 0.187769831 |
| GO:0000775~chromosome, centromeric region           | 0.001127328 | 7.542486231        | 0.163240251 | 0.017663959 | 1.349882119 |
| GO:0000793~condensed chromosome                     | 0.048527052 | 4.833427869        | 0.999613955 | 0.353797258 | 45.08382775 |
| GO:0000779~condensed chromosome, centromeric region | 0.065578614 | 7.085365854        | 0.99997783  | 0.431094842 | 55.83564827 |

Enrichment Score: 1.9942403821216887

| Term                                    | PValue      | Fold<br>Enrichment | Bonferroni  | Benjamini   | FDR         |
|-----------------------------------------|-------------|--------------------|-------------|-------------|-------------|
| GO:0006730~one-carbon metabolic process | 0.001932511 | 5.351265823        | 0.708349823 | 0.142749434 | 2.839237976 |
| GO:0043414~biopolymer methylation       | 0.008414554 | 6.204366171        | 0.995404831 | 0.450135455 | 11.82301673 |
| GO:0032259~methylation                  | 0.011735525 | 5.632911392        | 0.999457726 | 0.495209975 | 16.11952629 |
| methyltransferase                       | 0.055256448 | 3.485359136        | 0.999952144 | 0.407581843 | 50.18492728 |

Enrichment Score: 1.9292045235495077

| Term                                                   | PValue      | Fold<br>Enrichment | Bonferroni  | Benjamini   | FDR         |
|--------------------------------------------------------|-------------|--------------------|-------------|-------------|-------------|
| hsa00310:Lysine degradation                            | 0.001367962 | 17.12121212        | 0.072524979 | 0.072524979 | 1.337401931 |
| GO:0018024~histone-lysine N-methyltransferase activity | 0.00533937  | 11.11558219        | 0.714284898 | 0.117746643 | 6.651022219 |
| GO:0016278~lysine N-methyltransferase activity         | 0.00533937  | 11.11558219        | 0.714284898 | 0.117746643 | 6.651022219 |
| GO:0016279~protein-lysine N-methyltransferase activity | 0.00533937  | 11.11558219        | 0.714284898 | 0.117746643 | 6.651022219 |
| GO:0042054~histone methyltransferase activity          | 0.009295436 | 9.120477696        | 0.887556518 | 0.166489278 | 11.31312122 |
| domain:Post-SET                                        | 0.010547965 | 18.96130952        | 0.998690483 | 0.182213892 | 14.57419346 |
| domain:SET                                             | 0.012385353 | 8.25526401         | 0.999590938 | 0.205037338 | 16.90061692 |
| IPR003616:Post-SET zinc-binding region                 | 0.013895822 | 16.42359514        | 0.986184186 | 0.378594396 | 17.10181228 |
| IPR001214:SET                                          | 0.015422278 | 7.597309315        | 0.991399939 | 0.351025833 | 18.80536576 |

|                                               |             |             |             |             |             |
|-----------------------------------------------|-------------|-------------|-------------|-------------|-------------|
| GO:0008276~protein methyltransferase activity | 0.0182432   | 7.113972603 | 0.986543973 | 0.264891907 | 21.0767893  |
| GO:0008170~N-methyltransferase activity       | 0.021285153 | 6.711294908 | 0.993490535 | 0.285114721 | 24.16344823 |
| SM00508:PostSET                               | 0.024737543 | 12.04643963 | 0.889670275 | 0.356514882 | 23.76250072 |
| SM00317:SET                                   | 0.034063996 | 5.572502685 | 0.952635261 | 0.398490454 | 31.29841131 |
| methyltransferase                             | 0.055256448 | 3.485359136 | 0.999952144 | 0.407581843 | 50.18492728 |

Enrichment Score: 1.8300576056858162

| Term                                                                                                                                           | PValue      | Fold<br>Enrichment | Bonferroni  | Benjamini   | FDR         |
|------------------------------------------------------------------------------------------------------------------------------------------------|-------------|--------------------|-------------|-------------|-------------|
| IPR019786:Zinc finger, PHD-type, conserved site                                                                                                | 6.82E-06    | 9.006487655        | 0.002085425 | 4.17E-04    | 0.009143667 |
| IPR001965:Zinc finger, PHD-type                                                                                                                | 5.01E-05    | 8.272625698        | 0.015199861 | 0.002549505 | 0.067066893 |
| IPR019787:Zinc finger, PHD-finger                                                                                                              | 2.98E-04    | 7.664344397        | 0.087026693 | 0.012922723 | 0.398015745 |
| SM00249:PHD                                                                                                                                    | 3.21E-04    | 6.067836257        | 0.027866551 | 0.009376494 | 0.347264263 |
| GO:0032452~histone demethylase activity                                                                                                        | 0.001211765 | 53.35479452        | 0.247026288 | 0.034844085 | 1.54666813  |
| zinc finger region:PHD-type 2                                                                                                                  | 0.003127356 | 13.48359788        | 0.859253173 | 0.067632572 | 4.546367355 |
| zinc finger region:PHD-type 3                                                                                                                  | 0.004111709 | 30.33809524        | 0.924168093 | 0.085098781 | 5.93698306  |
| zinc finger region:PHD-type 1                                                                                                                  | 0.004112952 | 12.25781626        | 0.924227289 | 0.082406291 | 5.938726185 |
| GO:0032451~demethylase activity                                                                                                                | 0.005256475 | 26.67739726        | 0.708658534 | 0.128054894 | 6.550958771 |
| IPR013129:Transcription factor jumonji<br>domain:JmjC                                                                                          | 0.026859363 | 11.63337989        | 0.999759156 | 0.473168162 | 30.57540997 |
| IPR003347:Transcription factor jumonji/aspartyl beta-hydroxylase                                                                               | 0.043113413 | 9.006487655        | 0.999998609 | 0.52725392  | 44.60560967 |
| SM00558:JmjC                                                                                                                                   | 0.074197614 | 6.606112054        | 0.998868616 | 0.492587686 | 56.61496085 |
| zinc finger region:PHD-type<br>dioxygenase                                                                                                     | 0.092751415 | 5.834249084        | 1           | 0.697231248 | 76.44812883 |
| GO:0016702~oxidoreductase activity, acting on single donors with<br>incorporation<br>of molecular oxygen, incorporation of two atoms of oxygen | 0.168029077 | 4.042029888        | 1           | 0.846118205 | 90.60419375 |
| GO:0016701~oxidoreductase activity, acting on single donors with<br>incorporation<br>of molecular oxygen                                       | 0.172001719 | 3.981701084        | 1           | 0.84122322  | 91.16491495 |
| iron                                                                                                                                           | 0.529790313 | 1.428385779        | 1           | 0.93977053  | 99.99039599 |
| GO:0005506~iron ion binding                                                                                                                    | 0.672693158 | 1.154865682        | 1           | 0.995680773 | 99.99994187 |
| oxidoreductase                                                                                                                                 | 0.915406538 | 0.724359336        | 1           | 0.999256298 | 100         |
| GO:0055114~oxidation reduction                                                                                                                 | 0.942781936 | 0.669955033        | 1           | 0.999999091 | 100         |

**Table S5**

Enrichment Score: 2.05520653893013

| Term                                                             | PValue      | Fold<br>Enrichment | Bonferroni  | Benjamini   | FDR         |
|------------------------------------------------------------------|-------------|--------------------|-------------|-------------|-------------|
| GO:0019725~cellular homeostasis                                  | 2.43E-05    | 3.922978773        | 0.025459257 | 0.025459257 | 0.03865368  |
| GO:0006873~cellular ion homeostasis                              | 5.13E-05    | 4.236257648        | 0.053053764 | 0.026888374 | 0.081688971 |
| GO:0055082~cellular chemical homeostasis                         | 5.98E-05    | 4.169369369        | 0.061564435 | 0.020957632 | 0.095211386 |
| GO:0050801~ion homeostasis                                       | 1.20E-04    | 3.873741712        | 0.119986644 | 0.031449397 | 0.191433421 |
| GO:0042552~myelination                                           | 2.47E-04    | 16.03603604        | 0.230648636 | 0.05109017  | 0.392313208 |
| GO:0008366~axon ensheathment                                     | 3.65E-04    | 14.50879451        | 0.321463586 | 0.053895686 | 0.579703918 |
| GO:0007272~ensheathment of neurons                               | 3.65E-04    | 14.50879451        | 0.321463586 | 0.053895686 | 0.579703918 |
| GO:0043218~compact myelin                                        | 4.51E-04    | 84.83628319        | 0.086337655 | 0.086337655 | 0.564274133 |
| GO:0048878~chemical homeostasis                                  | 9.18E-04    | 3.094453829        | 0.622745017 | 0.114722609 | 1.4507822   |
| GO:0019228~regulation of action potential in neuron              | 9.57E-04    | 11.28461795        | 0.638356043 | 0.106858777 | 1.513198461 |
| GO:0001508~regulation of action potential                        | 0.002259673 | 8.961314255        | 0.909507496 | 0.196202594 | 3.537569297 |
| GO:0042592~homeostatic process                                   | 0.003032565 | 2.434231835        | 0.960263194 | 0.235696093 | 4.720384985 |
| GO:0042391~regulation of membrane potential                      | 0.004722187 | 5.457039129        | 0.9934405   | 0.284749697 | 7.258969351 |
| GO:0043209~myelin sheath                                         | 0.006464551 | 24.23893805        | 0.726678723 | 0.35103021  | 7.807323496 |
| GO:0030003~cellular cation homeostasis                           | 0.017490709 | 3.358728808        | 0.999999993 | 0.667901423 | 24.49192749 |
| GO:0055080~cation homeostasis                                    | 0.029210562 | 2.982926983        | 1           | 0.760948925 | 37.6236393  |
| GO:0030005~cellular di-, tri-valent inorganic cation homeostasis | 0.037761529 | 3.221335873        | 1           | 0.830917913 | 45.81899971 |
| GO:0055066~di-, tri-valent inorganic cation homeostasis          | 0.045424144 | 3.05959516         | 1           | 0.861213338 | 52.29481365 |
| GO:0006875~cellular metal ion homeostasis                        | 0.075750771 | 3.109027395        | 1           | 0.94960014  | 71.46787402 |
| GO:0055065~metal ion homeostasis                                 | 0.086014806 | 2.972533509        | 1           | 0.949456141 | 76.11533618 |
| GO:0051336~regulation of hydrolase activity                      | 0.139911289 | 2.169861256        | 1           | 0.989675831 | 90.92442057 |
| GO:0019226~transmission of nerve impulse                         | 0.156357284 | 2.089266409        | 1           | 0.991363732 | 93.32604578 |
| GO:0006874~cellular calcium ion homeostasis                      | 0.186732685 | 2.663909811        | 1           | 0.993186681 | 96.27745303 |
| GO:0055074~calcium ion homeostasis                               | 0.197036228 | 2.593061146        | 1           | 0.992976816 | 96.96134967 |
| GO:0043085~positive regulation of catalytic activity             | 0.248403167 | 1.640609841        | 1           | 0.994142275 | 98.9393363  |
| GO:0044093~positive regulation of molecular function             | 0.341718263 | 1.455831258        | 1           | 0.996870335 | 99.87148146 |
| GO:0051345~positive regulation of hydrolase activity             | 0.428818501 | 2.042578892        | 1           | 0.998213244 | 99.98658338 |
| GO:0007268~synaptic transmission                                 | 0.701197799 | 1.226918193        | 1           | 0.999817699 | 99.99999956 |
| GO:0050877~neurological system process                           | 0.872256558 | 0.805777679        | 1           | 0.999998367 | 100         |

Enrichment Score: 1.6774356195641622

| Term                                                                                    | PValue   | Fold<br>Enrichment | Bonferroni  | Benjamini   | FDR         |
|-----------------------------------------------------------------------------------------|----------|--------------------|-------------|-------------|-------------|
| GO:0002474~antigen processing and presentation of peptide antigen<br>via MHC<br>class I | 3.27E-04 | 28.67620562        | 0.293709198 | 0.056307308 | 0.519935621 |

|                                                                           |             |             |             |             |             |
|---------------------------------------------------------------------------|-------------|-------------|-------------|-------------|-------------|
| GO:0048002~antigen processing and presentation of peptide antigen         | 0.00147787  | 17.41055341 | 0.792091774 | 0.145352223 | 2.327125998 |
| mhc i                                                                     | 0.002643424 | 37.96381579 | 0.513229958 | 0.513229958 | 3.424202808 |
| domain:Ig-like C1-type                                                    | 0.003855531 | 12.57434211 | 0.853378699 | 0.61708839  | 5.40650517  |
| GO:0019882~antigen processing and presentation                            | 0.004646526 | 7.341799631 | 0.99288899  | 0.297629083 | 7.146661526 |
| immune response                                                           | 0.008593187 | 3.954564145 | 0.90438709  | 0.690786627 | 10.7387509  |
| heterodimer                                                               | 0.008851814 | 6.143012264 | 0.910937142 | 0.453708861 | 11.04477624 |
| SM00407:IGc1                                                              | 0.009243444 | 9.051844467 | 0.477980351 | 0.477980351 | 9.163282854 |
| IPR003597:Immunoglobulin C1-set                                           | 0.018487766 | 7.101023018 | 0.997352487 | 0.94854601  | 22.24283252 |
| GO:0042612~MHC class I protein complex                                    | 0.02479911  | 12.11946903 | 0.993411026 | 0.633761865 | 27.00288516 |
| IPR003006:Immunoglobulin/major histocompatibility complex, conserved site | 0.034967396 | 5.550224888 | 0.999987856 | 0.940967942 | 38.11297818 |
| GO:0042611~MHC protein complex                                            | 0.089019731 | 5.953423381 | 0.999999992 | 0.666085754 | 68.91958152 |
| hsa04612:Antigen processing and presentation                              | 0.178339897 | 3.829066265 | 0.999999279 | 0.99103371  | 87.05651982 |
| IPR007110:Immunoglobulin-like                                             | 0.593744737 | 1.204764384 | 1           | 0.999999999 | 99.99946796 |
| IPR013783:Immunoglobulin-like fold                                        | 0.67108928  | 1.091477317 | 1           | 1           | 99.99996914 |
| Immunoglobulin domain                                                     | 0.886851993 | 0.807740761 | 1           | 0.999789747 | 100         |

Enrichment Score: 1.422597126082399

| Term                                 | PValue      | Fold Enrichment | Bonferroni  | Benjamini   | FDR         |
|--------------------------------------|-------------|-----------------|-------------|-------------|-------------|
| GO:0006706~steroid catabolic process | 0.012439646 | 17.41055341     | 0.999998315 | 0.564325584 | 18.0689046  |
| GO:0016042~lipid catabolic process   | 0.052581996 | 3.522366297     | 1           | 0.88989274  | 57.6821684  |
| GO:0008202~steroid metabolic process | 0.082520822 | 3.016680046     | 1           | 0.957317715 | 74.61946123 |

Enrichment Score: 1.3734763560145584

| Term                                     | PValue      | Fold Enrichment | Bonferroni  | Benjamini   | FDR         |
|------------------------------------------|-------------|-----------------|-------------|-------------|-------------|
| SM00280:KAZAL                            | 0.034690381 | 10.0357406      | 0.915537413 | 0.709375522 | 30.60746334 |
| domain:Kazal-like                        | 0.039766725 | 9.430756579     | 0.999999998 | 0.993538827 | 44.22588955 |
| IPR002350:Proteinase inhibitor I1, Kazal | 0.054934104 | 7.872873346     | 0.999999984 | 0.949940001 | 53.31395407 |

Enrichment Score: 1.094223868313612

| Term                                 | PValue      | Fold Enrichment | Bonferroni  | Benjamini   | FDR         |
|--------------------------------------|-------------|-----------------|-------------|-------------|-------------|
| steroid metabolism                   | 0.05460337  | 7.909128289     | 0.999999767 | 0.750539402 | 52.24678483 |
| GO:0008202~steroid metabolic process | 0.082520822 | 3.016680046     | 1           | 0.957317715 | 74.61946123 |
| lipid metabolism                     | 0.115756504 | 3.352213315     | 1           | 0.844173379 | 80.19775816 |

Enrichment Score: 0.997470634770057

| Term | PValue | Fold Enrichment | Bonferroni | Benjamini | FDR |
|------|--------|-----------------|------------|-----------|-----|
|------|--------|-----------------|------------|-----------|-----|

|                                      |             |             |             |             |             |
|--------------------------------------|-------------|-------------|-------------|-------------|-------------|
| GO:0015630~microtubule cytoskeleton  | 0.022155154 | 2.266421652 | 0.988676251 | 0.673789785 | 24.48314254 |
| microtubule                          | 0.108940683 | 2.739092048 | 1           | 0.859261646 | 78.09162005 |
| GO:0044430~cytoskeletal part         | 0.128734802 | 1.544638209 | 1           | 0.747940152 | 82.22347776 |
| GO:0007017~microtubule-based process | 0.150950395 | 2.408574582 | 1           | 0.990875966 | 92.61151135 |
| GO:0005874~microtubule               | 0.219508703 | 2.064143143 | 1           | 0.84051259  | 95.5234329  |

Enrichment Score: 0.9827211085507533

| Term                                                          | PValue      | Fold Enrichment | Bonferroni  | Benjamini   | FDR         |
|---------------------------------------------------------------|-------------|-----------------|-------------|-------------|-------------|
| oxidoreductase                                                | 0.033448787 | 2.251709122     | 0.999904244 | 0.685481941 | 36.09838067 |
| Secondary metabolites biosynthesis, transport, and catabolism | 0.076953622 | 6               | 0.429093934 | 0.429093934 | 33.82174085 |
| nadp                                                          | 0.124408406 | 3.24477058      | 1           | 0.835827076 | 82.60182777 |
| GO:0055114~oxidation reduction                                | 0.14880303  | 1.716533435     | 1           | 0.991372459 | 92.30832673 |
| GO:0009055~electron carrier activity                          | 0.256049255 | 2.259484859     | 1           | 0.999401689 | 97.98032133 |

Enrichment Score: 0.9643760199606757

| Term                            | PValue      | Fold Enrichment | Bonferroni | Benjamini   | FDR         |
|---------------------------------|-------------|-----------------|------------|-------------|-------------|
| iron                            | 0.025176738 | 3.108148661     | 0.99902761 | 0.628728605 | 28.51266864 |
| GO:0005506~iron ion binding     | 0.035802532 | 2.837194056     | 0.99995736 | 0.99995736  | 38.18386548 |
| heme                            | 0.245668498 | 3.137505437     | 1          | 0.93534462  | 97.55473392 |
| GO:0020037~heme binding         | 0.249364063 | 3.095120788     | 1          | 0.999635372 | 97.72731459 |
| GO:0046906~tetrapyrrole binding | 0.272912452 | 2.903175313     | 1          | 0.998132413 | 98.50750363 |

Enrichment Score: 0.9529608825552933

| Term                                    | PValue      | Fold Enrichment | Bonferroni  | Benjamini   | FDR         |
|-----------------------------------------|-------------|-----------------|-------------|-------------|-------------|
| GO:0031967~organelle envelope           | 0.04525387  | 2.006879817     | 0.999905031 | 0.733701473 | 44.03510045 |
| GO:0031975~envelope                     | 0.046078933 | 2.000426828     | 0.999920111 | 0.692524157 | 44.63827132 |
| GO:0005743~mitochondrial inner membrane | 0.052223996 | 2.587599051     | 0.999978065 | 0.69636692  | 48.94595328 |
| GO:0031090~organelle membrane           | 0.05510773  | 1.651314515     | 0.999988075 | 0.678155628 | 50.85916168 |
| GO:0031966~mitochondrial membrane       | 0.057889259 | 2.296752167     | 0.999993387 | 0.661836709 | 52.64184028 |
| GO:0019866~organelle inner membrane     | 0.069138326 | 2.406703069     | 0.999999402 | 0.667868557 | 59.26126348 |
| GO:0005740~mitochondrial envelope       | 0.075067963 | 2.159714449     | 0.999999833 | 0.67201453  | 62.39706864 |
| transit peptide:Mitochondrion           | 0.077581033 | 2.154062887     | 1           | 0.998755806 | 68.71189696 |
| transit peptide                         | 0.08171978  | 2.126824414     | 1           | 0.809163428 | 67.44368997 |
| mitochondrion                           | 0.119706799 | 1.67308483      | 1           | 0.838825339 | 81.33112491 |
| GO:0044429~mitochondrial part           | 0.150825708 | 1.710983863     | 1           | 0.773787443 | 87.1160551  |
| GO:0005739~mitochondrion                | 0.15519041  | 1.456863495     | 1           | 0.769261372 | 87.92192257 |
| mitochondrion inner membrane            | 0.448304308 | 1.967037088     | 1           | 0.982479067 | 99.96019501 |
| GO:0031980~mitochondrial lumen          | 0.594606831 | 1.494912479     | 1           | 0.964706846 | 99.99878343 |

|                                                |             |                    |            |             |             |
|------------------------------------------------|-------------|--------------------|------------|-------------|-------------|
| GO:0005759~mitochondrial matrix                | 0.594606831 | 1.494912479        | 1          | 0.964706846 | 99.99878343 |
| Enrichment Score: 0.9372789408800029           |             |                    |            |             |             |
| Term                                           | PValue      | Fold<br>Enrichment | Bonferroni | Benjamini   | FDR         |
| GO:0000302~response to reactive oxygen species | 0.023139848 | 6.49993994         | 1          | 0.748747001 | 31.11521524 |
| GO:0010035~response to inorganic substance     | 0.025916446 | 3.567040211        | 1          | 0.769543897 | 34.16721209 |
| GO:0006979~response to oxidative stress        | 0.044751832 | 3.715666886        | 1          | 0.868131083 | 51.75707056 |
| GO:0007568~aging                               | 0.060463982 | 4.431777232        | 1          | 0.913980868 | 62.95245262 |
| GO:0033554~cellular response to stress         | 0.490048042 | 1.291949193        | 1          | 0.998586087 | 99.99779391 |
| GO:0010033~response to organic substance       | 0.536459289 | 1.183241494        | 1          | 0.999068666 | 99.99951712 |
| GO:0009719~response to endogenous stimulus     | 0.644211486 | 1.203692581        | 1          | 0.999687149 | 99.99999285 |
